# Supplementary material for: Association of Plasma Phospholipid n-3 and n-6 Polyunsaturated Fatty Acids with Type 2 Diabetes: The EPIC-InterAct Case-Cohort Study
Source: PubMed Central journal article supplement (PMC4951144; doi:10.1371/journal.pmed.1002094), 2016-07-19

**S2 Fig. Flow diagram of systematic literature search and identification of studies for the prospective associations of circulating concentrations of n-3 and n-6 PUFAs with incident T2D.**

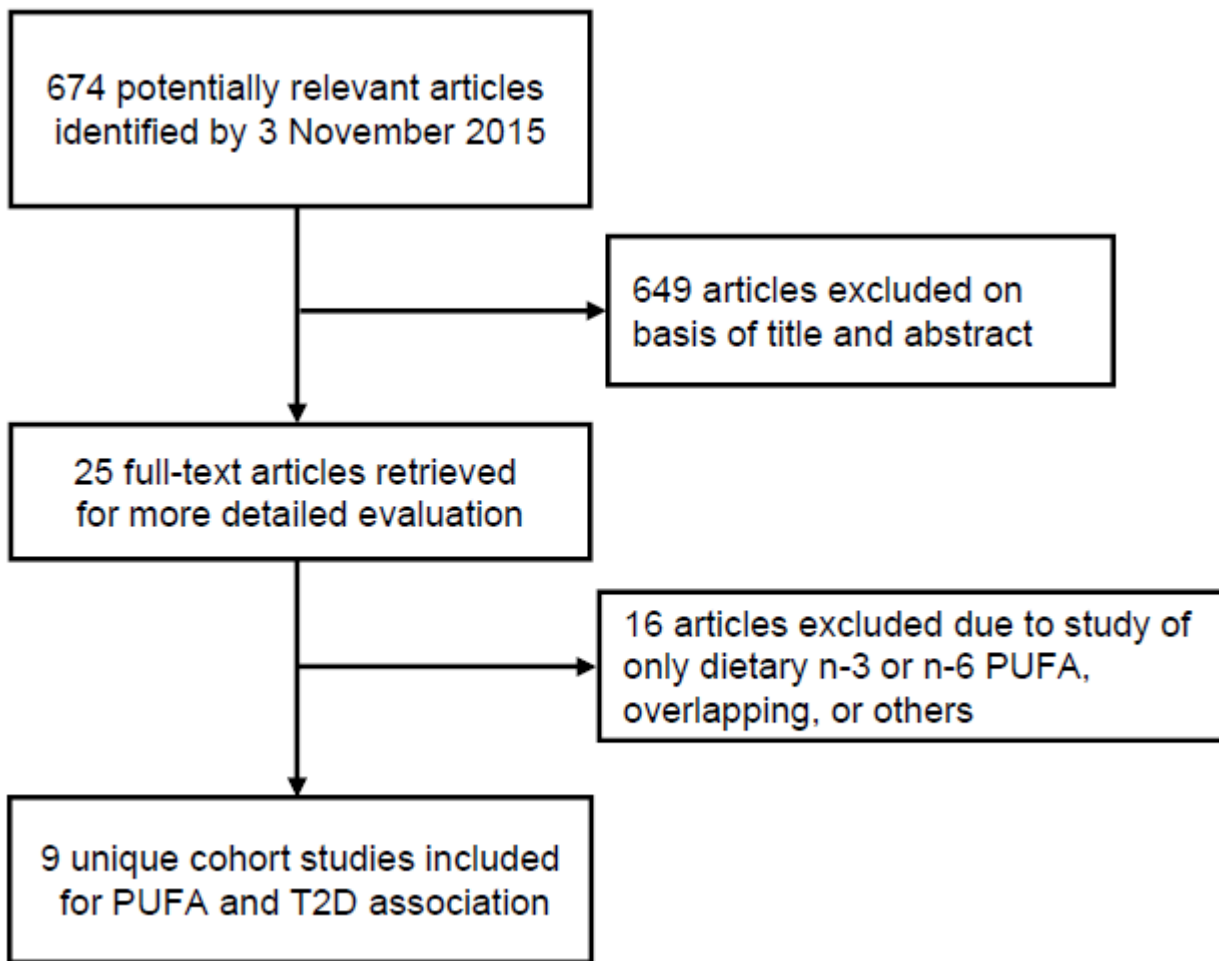

Supplement: pmed.1002094.s002.pdf [file pmed.1002094.s002.pdf]
