# Supplementary material for: Association of Plasma Phospholipid n-3 and n-6 Polyunsaturated Fatty Acids with Type 2 Diabetes: The EPIC-InterAct Case-Cohort Study
Source: PLoS Med. 2016 Jul 19;13(7):e1002094. doi: 10.1371/journal.pmed.1002094 (PMC4951144; doi:10.1371/journal.pmed.1002094)
Supplement: S6 Table — (DOC) [file pmed.1002094.s011.doc]

| **S6 Table. Meta-analysis results by lipid fraction** **for the prospective associations of circulating fatty acids with incidence of T2D** | | | | | | |
| --- | --- | --- | --- | --- | --- | --- |
| Fatty acids | Fraction* | N studies | HR (95% CI) by fraction† | HR (95% CI) overall‡ | I2 crude | I2 adjusted for fraction§ |
| **n3 PUFA** |  |  |  |  |  |  |
| Total n3 | Total serum | 2 | 0.83 (0.73, 0.95) |  |  |  |
|  | Erythrocytes | 2 | 0.99 (0.90, 1.09) |  |  |  |
|  | Phospholipids | 1 | 1.10 (0.95, 1.27) | 0.95 (0.84, 1.06) | 63.2 | 0.0 |
| 18:3n3 | Total serum | 2 | 1.01 (0.88, 1.17) |  |  |  |
|  | Triglycerides | 1 | 0.83 (0.63, 1.09) |  |  |  |
|  | Chol. esters | 2 | 0.89 (0.78, 1.02) |  |  |  |
|  | Erythrocytes | 3 | 0.97 (0.88, 1.06) |  |  |  |
|  | Phospholipids | 4 | 0.93 (0.88, 0.99) | 0.96 (0.92, 0.99) | 0.0 |  |
| 20:5n3 | Total serum | 2 | 0.86 (0.66, 1.11) |  |  |  |
|  | Triglycerides | 1 | 1.01 (0.80, 1.28) |  |  |  |
|  | Chol. esters | 2 | 1.00 (0.92, 1.08) |  |  |  |
|  | Erythrocytes | 4 | 0.92 (0.83, 1.01) |  |  |  |
|  | Phospholipids | 4 | 1.02 (0.95, 1.09) | 0.96 (0.90, 1.01) | 38.7 | 31.6 |
| 22:5n3 | Total serum | 2 | 0.84 (0.68, 1.04) |  |  |  |
|  | Triglycerides | 1 | 0.74 (0.55, 0.99) |  |  |  |
|  | Erythrocytes | 3 | 0.95 (0.88, 1.04) |  |  |  |
|  | Phospholipids | 2 | 0.96 (0.78, 1.19) | 0.92 (0.86, 0.99) | 38.2 | 44.9 |
| 22:6n3 | Total serum | 3 | 0.90 (0.83, 0.97) |  |  |  |
|  | Triglycerides | 1 | 0.99 (0.77, 1.27) |  |  |  |
|  | Chol. esters | 2 | 0.99 (0.91, 1.09) |  |  |  |
|  | Erythrocytes | 4 | 1.02 (0.93, 1.12) |  |  |  |
|  | Phospholipids | 4 | 1.00 (0.92, 1.10) | 0.97 (0.91, 1.03) | 52.6 | 56.4 |
|  |  |  |  |  |  |  |
| **n-6 PUFA** |  |  |  |  |  |  |
| Total n6 | Total serum | 2 | 0.84 (0.58, 1.22) |  |  |  |
|  | Erythrocytes | 2 | 0.93 (0.85, 1.03) |  |  |  |
|  | Phospholipids | 1 | 0.93 (0.80, 1.09) | 0.89 (0.77, 1.02) | 73.9 | 82.4 |
| 18:2n6 | Total serum | 3 | 0.96 (0.84, 1.10) |  |  |  |
|  | Triglycerides | 1 | 0.82 (0.63, 1.06) |  |  |  |
|  | Chol. esters | 2 | 0.82 (0.71, 0.95) |  |  |  |
|  | Erythrocytes | 4 | 0.82 (0.68, 0.97) |  |  |  |
|  | Phospholipids | 3 | 0.79 (0.70, 0.89) | 0.86 (0.77, 0.95) | 50.1 | 25.9 |
| 18:3n6 | Triglycerides | 1 | 1.09 (0.86, 1.38) |  |  |  |
|  | Chol. esters | 2 | 1.05 (0.89, 1.23) |  |  |  |
|  | Erythrocytes | 2 | 1.17 (0.95, 1.45) |  |  |  |
|  | Phospholipids | 1 | 1.12 (0.97, 1.30) | 1.19 (1.08, 1.30) | 0.0 |  |
| 20:2n6 | Erythrocytes | 2 | 0.82 (0.54, 1.23) |  |  |  |
| 20:3n6 | Total serum | 1 | 1.03 (0.87, 1.22) |  |  |  |
|  | Triglycerides | 1 | 1.12 (0.90, 1.40) |  |  |  |
|  | Chol. esters | 2 | 1.14 (0.97, 1.34) |  |  |  |
|  | Erythrocytes | 3 | 1.19 (1.06, 1.33) |  |  |  |
|  | Phospholipids | 3 | 1.49 (1.21, 1.83) | 1.30 (1.11, 1.52) | 77.0 | 59.7 |
| 20:4n6 | Total serum | 1 | 0.79 (0.67, 0.93) |  |  |  |
|  | Triglycerides | 1 | 0.88 (0.69, 1.12) |  |  |  |
|  | Chol. esters | 2 | 1.12 (0.98, 1.29) |  |  |  |
|  | Erythrocytes | 4 | 0.99 (0.87, 1.14) |  |  |  |
|  | Phospholipids | 3 | 1.15 (1.05, 1.27) | 1.02 (0.91, 1.16) | 71.4 | 0.0 |
| 22:4n6 | Erythrocytes | 3 | 1.23 (0.93, 1.64) |  |  |  |
|  | Phospholipids | 1 | 1.14 (1.07, 1.21) | 1.15 (0.94, 1.41) | 60.2 |  |
| 22:5n6 | Phospholipids | 1 | 1.22 (0.97, 1.53) | 1.22 (0.97, 1.53) |  |  |
| **Ratios** |  |  |  |  |  |  |
| 18:3n6/18:2n6 | Total serum | 1 | 0.94 (0.79, 1.11) |  |  |  |
|  | Triglycerides | 1 | 1.14 (0.91, 1.43) |  |  |  |
|  | Chol. esters | 1 | 1.26 (0.18, 8.91) |  |  |  |
|  | Phospholipids | 1 | 1.60 (1.29, 1.99) | 1.22 (0.73, 2.06) | 93.0 | 84.2 |
| 20:4n6/20:3n6 | Total serum | 1 | 0.79 (0.66, 0.95) |  |  |  |
|  | Triglycerides | 1 | 0.74 (0.57, 0.97) |  |  |  |
|  | Chol. esters | 1 | 0.88 (0.47, 1.65) |  |  |  |
|  | Erythrocytes | 3 | 0.80 (0.67, 0.97) |  |  |  |
|  | Phospholipids | 3 | 0.75 (0.66, 0.85) | 0.77 (0.70, 0.84) | 0.0 |  |
| 20:3n6/18:2n6 | Erythrocytes | 3 | 1.41 (1.17, 1.70) |  |  |  |
|  | Phospholipids | 1 | 1.91 (1.55, 2.34) | 1.56 (1.30, 1.89) | 40.0 | 0.0 |
| n6/n3 | Phospholipids | 1 | 0.93 (0.80, 1.07) | 0.93 (0.80, 1.07) |  |  |

* Studies assessed relative concentrations of each fatty acid (% total fatty acids) of different lipid fractions. Chol. stands for cholesteryl. Triglycerides, cholesteryl esters, and phospholipids, if used, were taken from plasma samples in each study. Erythrocytes means erythrocyte membrane.

† Hazard ratio (HR) and 95% confidence interval (CI) were estimated per study-specific standard deviation for each lipid fraction. If a single study assessed fatty acids in different lipid fractions, multiple estimates by fraction were included in the fraction-specific HR. For the overall HR, only one estimate from each study was included.

‡ HR and 95% CI were estimated per study-specific standard deviation. See the main table (Table 3) for the number of studies evaluated in the analysis for each fatty acid (one estimate from each study).

§ I2 was calculated after controlling for a categorical variable of lipid fractions. None of the categories for any fatty acids showed statistically significant heterogeneity owing to lipid fraction. Adjusted I2 were not calculated when crude I2 were zero or when multiple fractions were not used across studies or when meta-regression needed to pool multiple fractions from a single cohort.
